# Supplementary material for: LncRNA-SVUGP2 suppresses progression of hepatocellular carcinoma
Source: PubMed Central journal article supplement (PMC5716695; doi:10.18632/oncotarget.18279), 2017-05-29
Supplement: oncotarget-08-97835-s001.pdf [file oncotarget-08-97835-s001.pdf]

# LncRNA-SVUGP2 suppresses progression of hepatocellular carcinoma

## Supplementary Materials

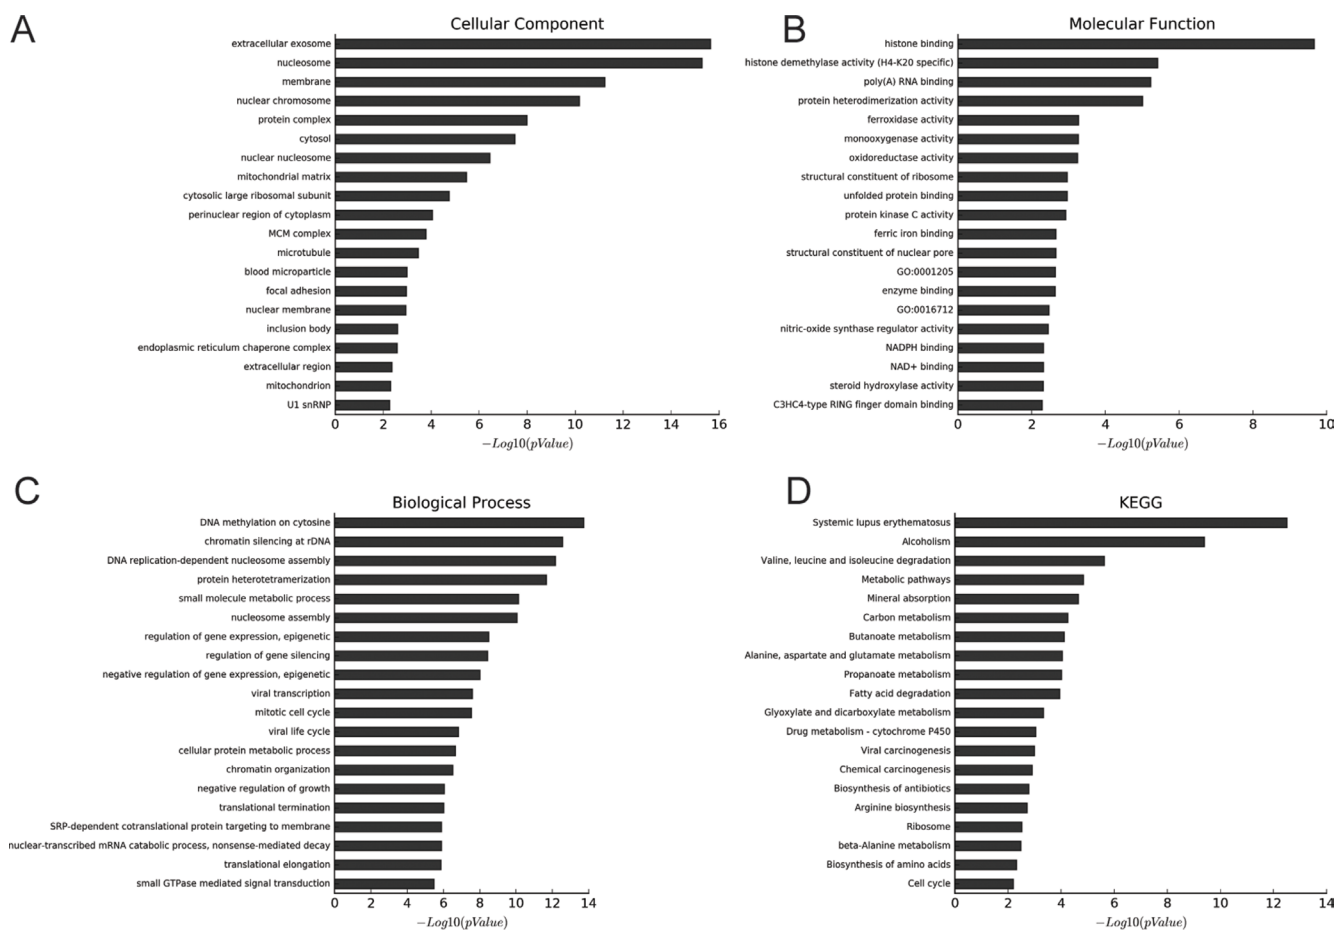

Supplementary Figure 1: GO analysis and KEGG pathway analysis were performed to evaluate the functional categories and involved pathways of the dysregulated coding genes in HCC.

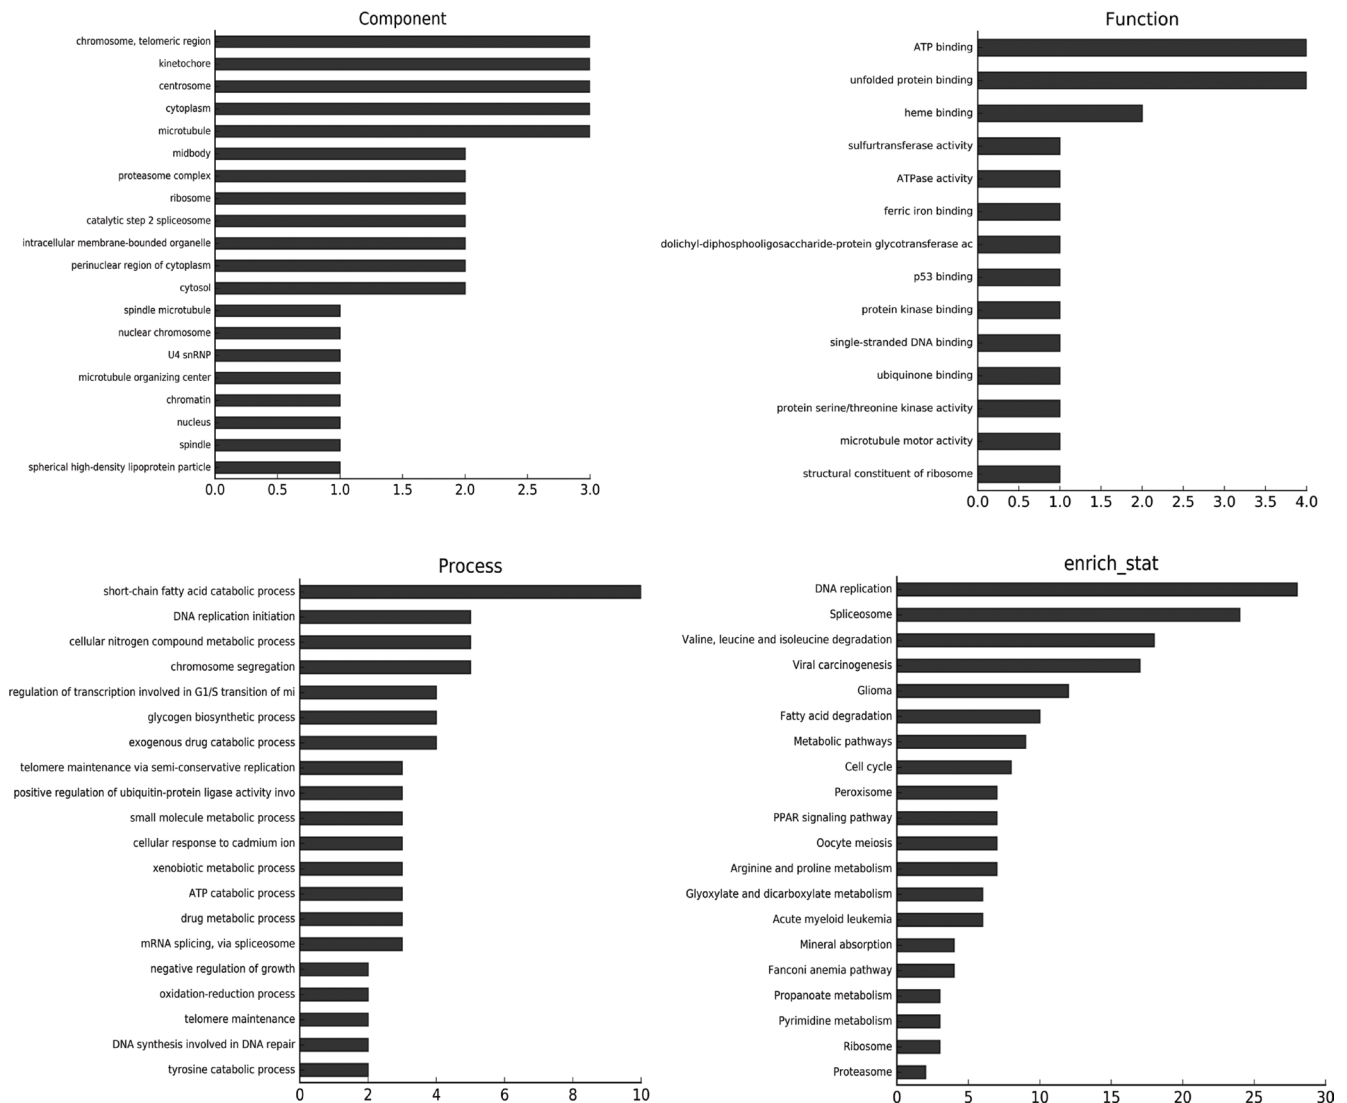

**Supplementary Figure 2: GO analysis and KEGG pathway analysis for the top 200 co-expressed mRNAs of the lncRNA-SVUGP2.**
